# Supplementary material for: Expanding the applicability of electrostatic potentials to the realm of transition states
Source: Royal Society of Chemistry journal article supplement (doi:10.1039/c6cp01506a), 2016-01-01
Supplement: c6cp01506a1.pdf [file c6cp01506a1.pdf]

# **SUPPORTING INFORMATION**

**Expanding the applicability of electrostatic potentials to the realm of transition states**

Priya Bhasi, Zanele P. Nhlabatsi, Sanyasi Sitha\*

Department of Chemistry, University of Johannesburg, PO Box 524, Auckland Park,  
Johannesburg, South Africa 2006

**Table S1:** Results for the effect of various basis sets on B3LYP method for the OH + NO<sub>2</sub> → HNO<sub>3</sub> reaction potential energy surface. Where  $\Delta E_1 = E_{TS} - E_{\text{Reactants}}$ ,  $\Delta E_2 = E_{TS} - E_{\text{Product}}$  and  $\Delta E_3 = E_{\text{Reactants}} - E_{\text{Product}}$ . All the energies are in kcal/mol and are ZPE corrected.

| <b>Basic sets</b>       | $\Delta E_1$ | $\Delta E_2$ | $\Delta E_3$ |
|-------------------------|--------------|--------------|--------------|
| <b>6-31G</b>            | 32.1         | 69.5         | 37.4         |
| <b>6-31G(d)</b>         | 31.6         | 77.8         | 46.2         |
| <b>6-31+G(d)</b>        | 29.2         | 72.4         | 43.2         |
| <b>6-31++G(d)</b>       | 29.2         | 72.5         | 43.3         |
| <b>6-31++G(d,p)</b>     | 29.1         | 72.2         | 43.1         |
| <b>6-31++G(2df,2p)</b>  | 28.3         | 72.4         | 44.1         |
| <b>6-31++G(2df,2pd)</b> | 28.3         | 72.4         | 44.1         |
| <b>6-31++G(3df,2pd)</b> | 28.4         | 72.5         | 44.1         |
| <b>6-31++G(3df,3pd)</b> | 28.3         | 72.4         | 44.1         |
| <b>Aug-CC-pVDZ</b>      | 28.5         | 72.1         | 43.6         |
| <b>Aug-CC-PVTZ</b>      | 28.2         | 71.5         | 43.3         |
| <b>Aug-CC-PVQZ</b>      | 28.2         | 71.8         | 43.6         |

**Table S2:** Results for the effect of various methods using 6-31++G(3df,2pd) basis set for the OH + NO<sub>2</sub> → HNO<sub>3</sub> reaction potential energy surface. Where  $\Delta E_1 = E_{TS} - E_{\text{Reactants}}$ ,  $\Delta E_2 = E_{TS} - E_{\text{Product}}$  and  $\Delta E_3 = E_{\text{Reactants}} - E_{\text{Product}}$ . All the energies are in kcal/mol and are ZPE corrected.

| <b>Methods</b> | $\Delta E_1$ | $\Delta E_2$ | $\Delta E_3$ |
|----------------|--------------|--------------|--------------|
| <b>HF</b>      | 96.8         | 109.7        | 12.9         |
| <b>B3LYP</b>   | 28.4         | 72.5         | 44.1         |
| <b>X3LYP</b>   | 29.3         | 73.9         | 44.6         |
| <b>O3LYP</b>   | 23.7         | 69.1         | 45.4         |
| <b>B3PW91</b>  | 29.8         | 76.5         | 46.7         |
| <b>M06</b>     | 26.0         | 76.8         | 50.8         |

**Figure S1:** Computed ESP map of transition state calculated from the B3LYP/6-31++G (3df,3pd) method at 0.001 au electron density surfaces. Quantitative values of electrostatic potentials are also in au.

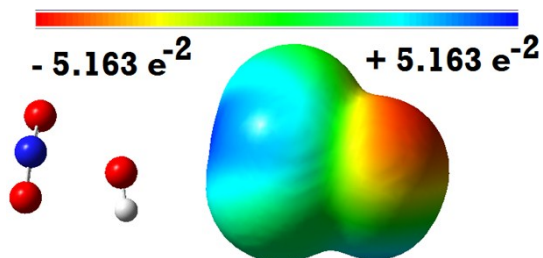

## Cartesian Coordinates of stationary points

### Transition State

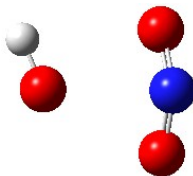

#### Transition State: X3LYP/6-31++G(3df,2pd)

Imaginary frequency 707.7086i

|   |             |             |             |
|---|-------------|-------------|-------------|
| N | 0.72070000  | 0.05269700  | 0.24207200  |
| O | 0.75354400  | -1.04822500 | -0.12091600 |
| O | 0.49315600  | 1.14152500  | -0.10286900 |
| O | -1.62302500 | -0.21859000 | 0.03293900  |
| H | -2.03429400 | 0.63343600  | -0.16773700 |

#### Transition State: O3LYP/6-31++G(3df,2pd)

Imaginary frequency 631.6697i

|   |             |             |             |
|---|-------------|-------------|-------------|
| N | 0.74156300  | 0.03855300  | 0.24301900  |
| O | 0.74734100  | -1.06498500 | -0.12122300 |
| O | 0.55175000  | 1.13608700  | -0.10264500 |
| O | -1.68788400 | -0.18860100 | 0.03284800  |
| H | -2.08059900 | 0.67012100  | -0.17297500 |

**Transition State: M06/6-31++G(3df,2pd)**

Imaginary frequency 730.6674i

|   |             |             |             |
|---|-------------|-------------|-------------|
| N | 0.71873700  | 0.05711200  | 0.22917000  |
| O | 0.75592600  | -1.04244100 | -0.11497500 |
| O | 0.47875000  | 1.14070600  | -0.09749500 |
| O | -1.60962600 | -0.22557800 | 0.03255500  |
| H | -2.03155600 | 0.61871200  | -0.16486200 |

**Transition State: HF/6-31++G(3df,2pd)**

Imaginary frequency 750.1492i

|   |             |             |             |
|---|-------------|-------------|-------------|
| N | 0.73097400  | 0.26118900  | 0.00000700  |
| O | 1.29515100  | -0.69703600 | 0.00003400  |
| O | -0.07981200 | 0.98012200  | -0.00001800 |
| O | -1.54990100 | -0.48808300 | -0.00012000 |
| H | -2.44031100 | -0.18835100 | 0.00077400  |

**Transition State: B3PW91/6-31++G(3df,2pd)**

Imaginary frequency 713.0316i

|   |             |             |             |
|---|-------------|-------------|-------------|
| N | 0.72126100  | 0.05389900  | 0.23798600  |
| O | 0.75270400  | -1.04619100 | -0.11865900 |
| O | 0.48913900  | 1.13998100  | -0.10153000 |
| O | -1.61939500 | -0.22018500 | 0.03184500  |
| H | -2.02841600 | 0.63387100  | -0.15915000 |

**Transition State: B3LYP/6-31G**

Imaginary frequency 720.1156i

|   |             |             |             |
|---|-------------|-------------|-------------|
| N | 0.67910900  | 0.15153000  | -0.29653200 |
| O | 0.22163200  | 1.18799700  | 0.13952300  |
| O | 0.98354800  | -0.93482400 | 0.12787000  |
| O | -1.53605400 | -0.43209900 | 0.00493400  |
| H | -2.10676900 | 0.37070600  | -0.10288900 |

**Transition State: B3LYP/6-31G(d)**

Imaginary frequency 722.0501i

|   |             |             |             |
|---|-------------|-------------|-------------|
| N | 0.69783600  | 0.11158500  | -0.28101700 |
| O | 0.33262500  | 1.16121600  | 0.12921700  |
| O | 0.88677800  | -0.97819600 | 0.12638700  |
| O | -1.57648500 | -0.34572200 | -0.00701400 |
| H | -2.02819500 | 0.52052500  | -0.02159700 |

**Transition State: B3LYP/6-31+G(d)**

Imaginary frequency 681.5423i

|   |             |             |             |
|---|-------------|-------------|-------------|
| N | 0.72077400  | 0.06169100  | -0.25803400 |
| O | 0.47347800  | 1.15190900  | 0.11111400  |
| O | 0.78152900  | -1.04313700 | 0.12637700  |
| O | -1.62723000 | -0.23972900 | -0.02919400 |

H -2.06764100 0.61582600 0.13985600

**Transition State: B3LYP/6-31+G(d,p)**

N 0.721195 0.060981 0.257547  
O 0.781181 -1.043807 -0.126867  
O 0.475400 1.151744 -0.110343  
O -1.629356 -0.237823 0.030985  
H -2.066162 0.612216 -0.153032

**Transition State: B3LYP/6-31++G(d)**

Imaginary frequency 681.1372i

N 0.72097200 0.06182700 -0.25797100  
O 0.47319300 1.15196900 0.11106000  
O 0.78198800 -1.04301700 0.12638500  
O -1.62761500 -0.24006100 -0.02927100  
H -2.06733700 0.61609100 0.14041300

**Transition State: B3LYP/6-31++G(d,p)**

Imaginary frequency 680.0879i

N 0.72127600 0.06063400 -0.25751800  
O 0.47636000 1.15163700 0.11028900  
O 0.78050400 -1.04418700 0.12690000  
O -1.62971900 -0.23715000 -0.03108200  
H -2.06609200 0.61316000 0.15377300

**Transition State: B3LYP/6-31++G(2df,2p)**

Imaginary frequency 698.0726i

N 0.72191600 0.05197600 -0.24318400  
O 0.49675300 1.14246100 0.10330300  
O 0.75466500 -1.04979600 0.12141500  
O -1.62764500 -0.21737900 -0.03296700  
H -2.04359300 0.63388200 0.16828800

**Transition State: B3LYP/6-31++G(2df,2pd)**

Imaginary frequency 698.2202i

N 0.72195200 0.05165000 -0.24312200  
O 0.49759900 1.14234200 0.10328200  
O 0.75390300 -1.05014400 0.12139500  
O -1.62767800 -0.21655100 -0.03300900  
H -2.04425800 0.63327900 0.16850700

**Transition State: B3LYP/6-31++G(3df,2pd)**

Imaginary frequency 695.3579i

|   |             |             |             |
|---|-------------|-------------|-------------|
| N | 0.72279500  | 0.05174500  | -0.24443800 |
| O | 0.49818000  | 1.14226100  | 0.10392100  |
| O | 0.75511800  | -1.05028700 | 0.12180000  |
| O | -1.63088900 | -0.21698300 | -0.03256500 |
| H | -2.03883400 | 0.63785600  | 0.16581900  |

**Transition State: B3LYP/6-31++G(3df,3pd)**

Imaginary frequency 695.9760i

|   |             |             |             |
|---|-------------|-------------|-------------|
| N | 0.72258100  | 0.05302100  | -0.24437500 |
| O | 0.49492600  | 1.14283400  | 0.10409700  |
| O | 0.75788600  | -1.04904800 | 0.12149300  |
| O | -1.63006300 | -0.21965600 | -0.03191400 |
| H | -2.04005600 | 0.63580800  | 0.16122000  |

**Transition State: B3LYP/Aug-CC-pVDZ**

Imaginary frequency 691.4846i

|   |             |             |             |
|---|-------------|-------------|-------------|
| N | 0.72156500  | 0.05904300  | -0.24965700 |
| O | 0.47927700  | 1.14791000  | 0.10705300  |
| O | 0.77168400  | -1.04488900 | 0.12312100  |
| O | -1.62667700 | -0.23291200 | -0.03027200 |
| H | -2.04522700 | 0.62582200  | 0.14838700  |

**Transition State: B3LYP/Aug-CC-pVTZ**

Imaginary frequency 699.2081i

|   |             |             |             |
|---|-------------|-------------|-------------|
| N | 0.72413900  | 0.04965600  | -0.23941000 |
| O | 0.50393900  | 1.13788100  | 0.10116300  |
| O | 0.75071900  | -1.04929900 | 0.12030000  |
| O | -1.63289000 | -0.21186200 | -0.03429900 |
| H | -2.04311300 | 0.63864900  | 0.17856100  |

**Transition State: B3LYP/Aug-CC-pVQZ**

Imaginary frequency 700.4789i

|   |             |             |             |
|---|-------------|-------------|-------------|
| N | -0.72363800 | 0.04987400  | 0.23899900  |
| O | -0.50304700 | 1.13718300  | -0.10115900 |
| O | -0.75102800 | -1.04823600 | -0.11983800 |
| O | 1.63191600  | -0.21231000 | 0.03362500  |
| H | 2.04274700  | 0.63778100  | -0.17401300 |

**Geometry of NO<sub>2</sub>:B3LYP/6-31+G(d,p)**

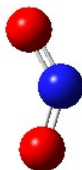

|   |          |           |           |
|---|----------|-----------|-----------|
| N | 0.000000 | 0.000000  | 0.326575  |
| O | 0.000000 | 1.106215  | -0.142877 |
| O | 0.000000 | -1.106215 | -0.142877 |

**Geometry of NO:B3LYP/6-31+G(d,p)**

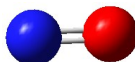

|   |          |          |           |
|---|----------|----------|-----------|
| O | 0.000000 | 0.000000 | 0.540241  |
| N | 0.000000 | 0.000000 | -0.617418 |

**Geometry of OH:B3LYP/6-31+G(d,p)**

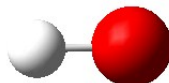

|   |          |          |           |
|---|----------|----------|-----------|
| O | 0.000000 | 0.000000 | 0.108890  |
| H | 0.000000 | 0.000000 | -0.871121 |

**Geometry of NH:B3LYP/6-31+G(d,p)**

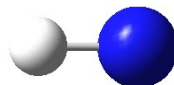

|   |          |          |           |
|---|----------|----------|-----------|
| N | 0.000000 | 0.000000 | 0.130641  |
| H | 0.000000 | 0.000000 | -0.914485 |

**Geometry of the product HNO<sub>3</sub>:B3LYP/6-31+G(d,p)**

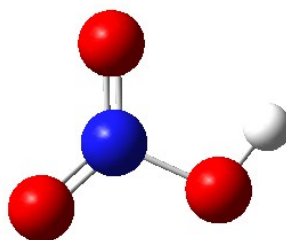

|   |           |           |           |
|---|-----------|-----------|-----------|
| N | -0.148211 | 0.034479  | -0.000119 |
| O | -1.044289 | -0.767762 | 0.000105  |
| O | -0.182339 | 1.252003  | 0.000036  |
| O | 1.139414  | -0.543149 | -0.000040 |
| H | 1.735192  | 0.229907  | 0.000031  |

**Geometry of the OH + NO<sub>2</sub> transition state:B3LYP/6-31+G(d,p)**

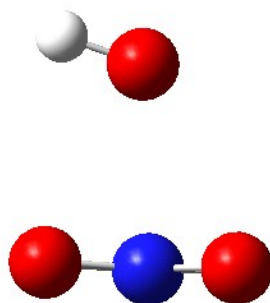

|   |           |           |           |
|---|-----------|-----------|-----------|
| N | 0.721195  | 0.060981  | 0.257547  |
| O | 0.781181  | -1.043807 | -0.126867 |
| O | 0.475400  | 1.151744  | -0.110343 |
| O | -1.629356 | -0.237823 | 0.030985  |
| H | -2.066162 | 0.612216  | -0.153032 |

**Geometry of the OH + NO<sub>2</sub> transition state: uB3LYP/6-31+G(d,p) with guess=mix**

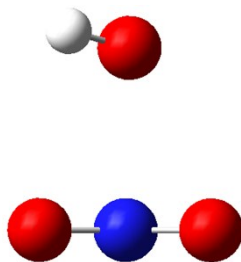

|   |          |           |           |
|---|----------|-----------|-----------|
| N | 0.026846 | 0.031320  | 0.016208  |
| O | 0.029476 | -0.014828 | 1.193878  |
| O | 0.798024 | 0.095352  | -0.880378 |
| O | 0.732522 | -2.304861 | 0.199943  |
| H | 1.513231 | -2.472610 | -0.359690 |

**Geometry of the OH + NO<sub>2</sub> transition state:wB97xD/6-31+G(d,p)**

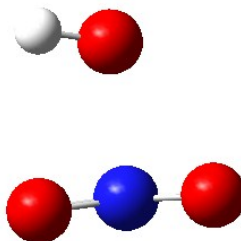

|   |           |           |           |
|---|-----------|-----------|-----------|
| N | 0.710657  | 0.069396  | 0.245468  |
| O | 0.769624  | -1.030361 | -0.121801 |
| O | 0.437889  | 1.147944  | -0.106215 |
| O | -1.574609 | -0.250826 | 0.031471  |
| H | -2.037826 | 0.580169  | -0.145911 |



**Geometry of the OH + NO<sub>2</sub> transition state:uwB97xD/6-31+G(d,p) – Broken Symmetry – Guess=mix option.**

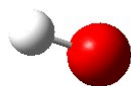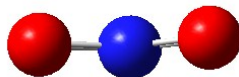

|   |           |           |           |
|---|-----------|-----------|-----------|
| N | 0.755779  | 0.066229  | 0.267471  |
| O | 0.779497  | -1.020784 | -0.187332 |
| O | 0.535036  | 1.177732  | -0.076763 |
| O | -1.669993 | -0.239678 | 0.158270  |
| H | -2.094584 | 0.532824  | -0.258634 |

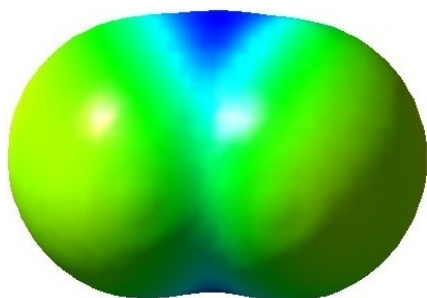

**O-N-O**

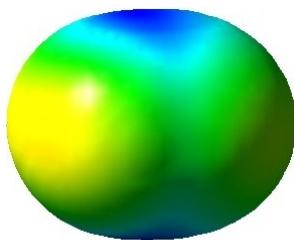

**N=O**

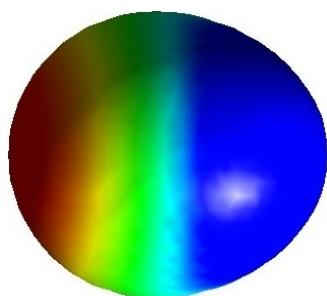

**OH**

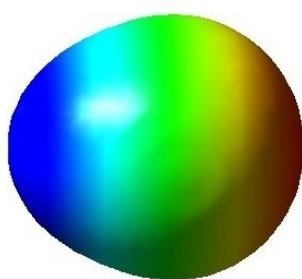

**HN**

**Figure S2:** Computed ESP maps of OH, NH, NO, and NO<sub>2</sub>, using B3LYP/6-31+G (d,p) method at 0.001 au electron density surfaces. ESP colour scheme: Red represents regions of negative and blue represents regions of positive electrostatic potentials.

Analysis of the ESP maps for the reactants HN and OH are quite similar. In both the cases there are positive electrostatic potentials around the H-atoms and negative electrostatic potentials around the N-atom and O-atom. Analysis of the ESP of the NO<sub>2</sub> shows that the regions of the positive electrostatic potential are above and below the central N-atom (above and below the plane of NO<sub>2</sub>). These positive regions are usually referred as  $\pi$ -holes. In NO<sub>2</sub>, accumulation of the  $\pi$ -holes above and below the N-atom can be explained as, “because of the more electronegative O-atoms,  $\pi$ -bonding electrons are drawn sufficiently towards the O-atoms, so that the associated rearrangement of the electronic density leaves a region of positive potentials above and below the N-atom”. Analysis of the ESP map of NO shows that, there is a positive  $\pi$ -hole region above and below the N=O  $\pi$ -bond. The  $\pi$ -hole region is almost on the central region of the NO molecule with a partial shifted in densities towards N-atom of the NO.
